# Supplementary material for: Synergistic recycling and conversion of spent Li-ion battery leachate into highly efficient oxygen evolution catalysts
Source: Royal Society of Chemistry journal article supplement (doi:10.1039/d1gc01578h), 2021-01-01
Supplement: d1gc01578h1.pdf [file d1gc01578h1.pdf]

## *Supporting Information*

### **Synergetic recycling and conversion of spent Li-ion battery leachates into high-efficiency oxygen evolution catalysts**

Zhijie Chen,<sup>a, b</sup> Wensong Zou,<sup>a</sup> Renji Zheng,<sup>a</sup> Wenfei Wei,<sup>a</sup> Wei Wei,<sup>b</sup> Bing-Jie Ni,<sup>b,\*</sup>

Hong Chen<sup>a,\*</sup>

*<sup>a</sup> State Environmental Protection Key Laboratory of Integrated Surface Water-Groundwater Pollution Control, Shenzhen Key Laboratory of Interfacial Science and Engineering of Materials (SKLISEM), School of Environmental Science and Engineering, Southern University of Science and Technology, Shenzhen 518055, PR China*

*<sup>b</sup> Centre for Technology in Water and Wastewater, School of Civil and Environmental Engineering, University of Technology Sydney, NSW 2007, Australia*

\*Corresponding Author:

Bing-Jie Ni      E-mail: bingjieni@gmail.com

Hong Chen      E-mail: chenh3@sustech.edu.cn

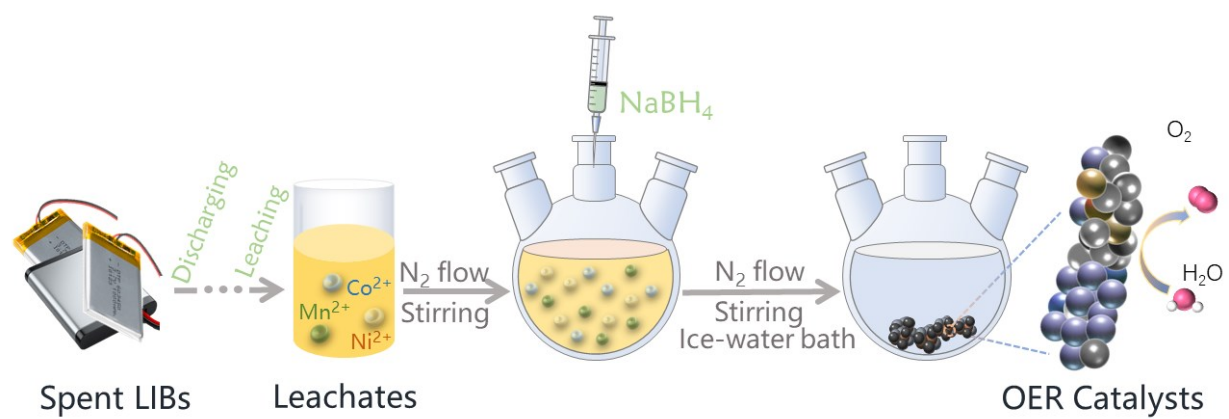

**Fig. S1.** Schematic illustration on synthesis magnetic NCMB OER electrocatalysts from the spent LIBs leachates via a facile boriding process.

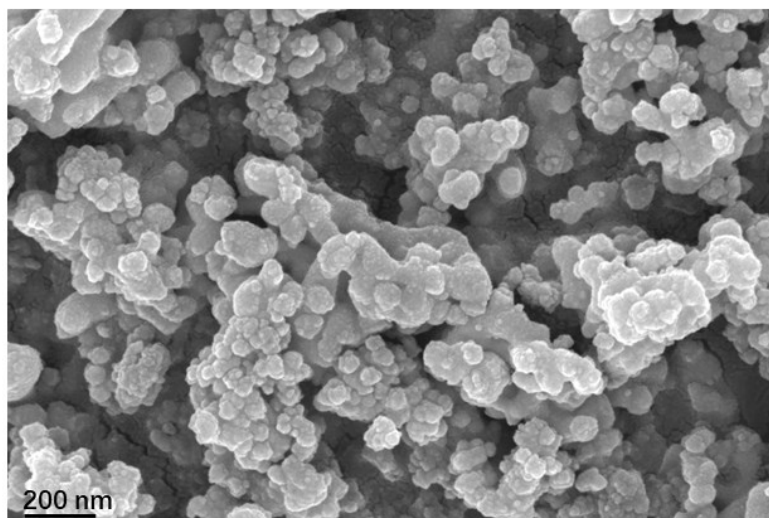

**Fig. S2.** SEM image of NCMB-1.

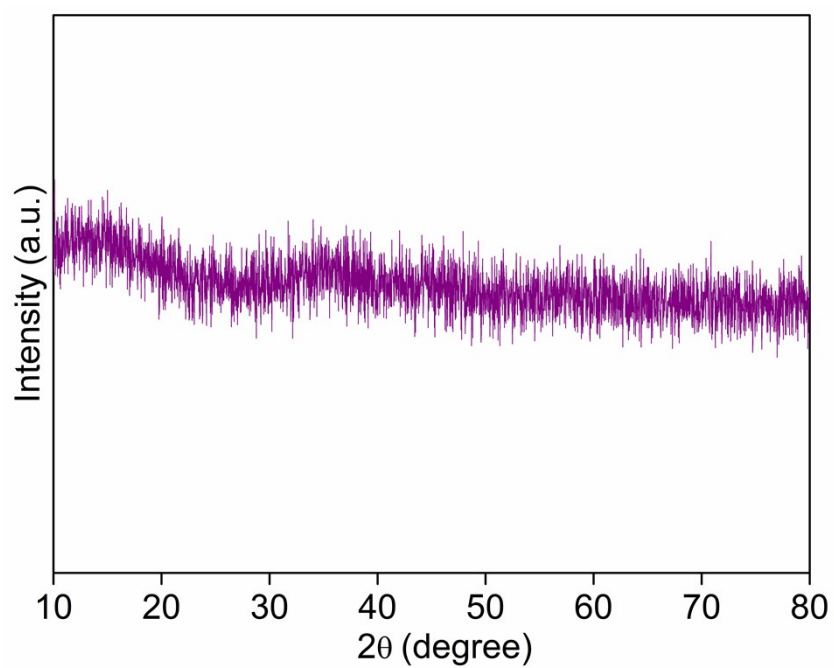

**Fig. S3.** XRD pattern of NCMB-1.

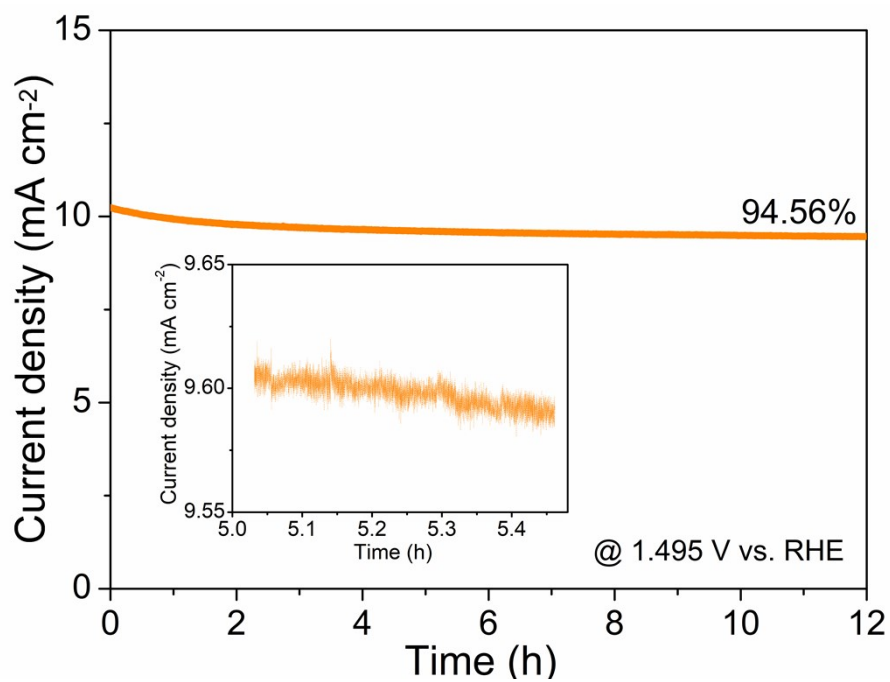

**Fig. S4.** Chronoamperometric i-t curve of NCMB-1 at an applied potential of 1.495 V vs. RHE (inset is a part of the stability curve).

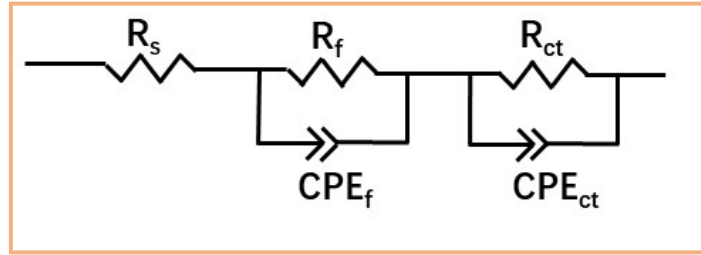

**Fig. S5.** Equivalent circuit model for EIS data fitting.

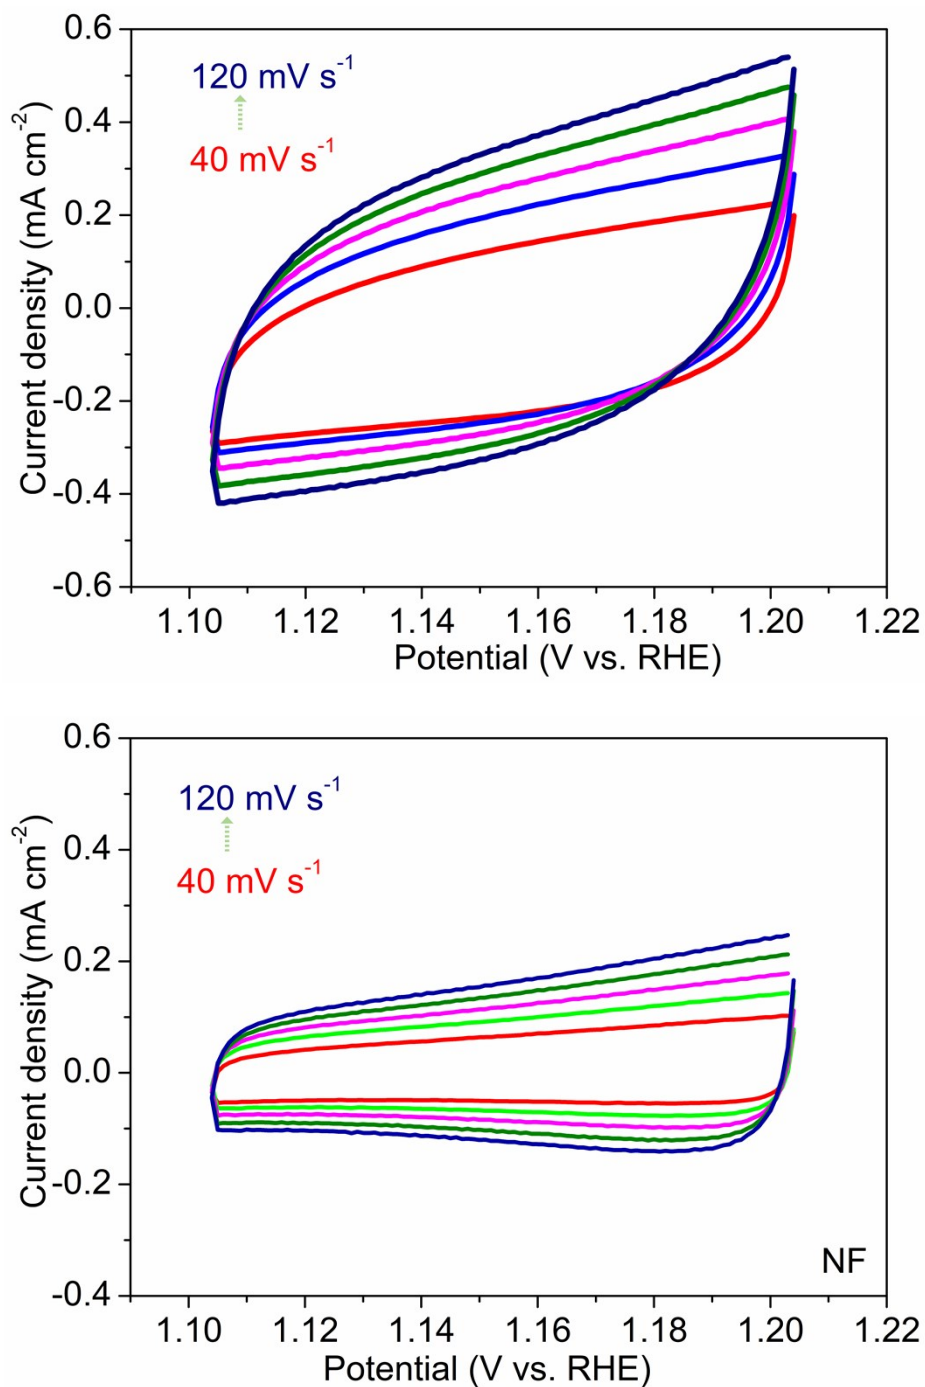

**Fig. S6.** CV measurements of NCMB-1(upper part), and NF (lower part) at different scan rate for  $C_{dl}$  determination.

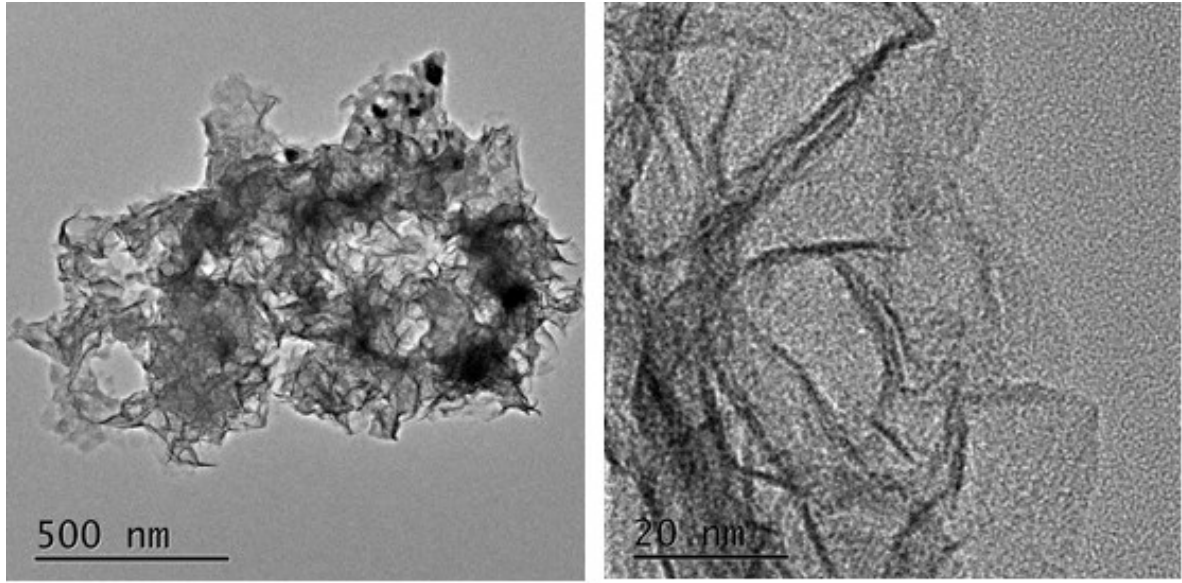

**Fig. S7.** TEM images of NCMB-2 after the OER test.



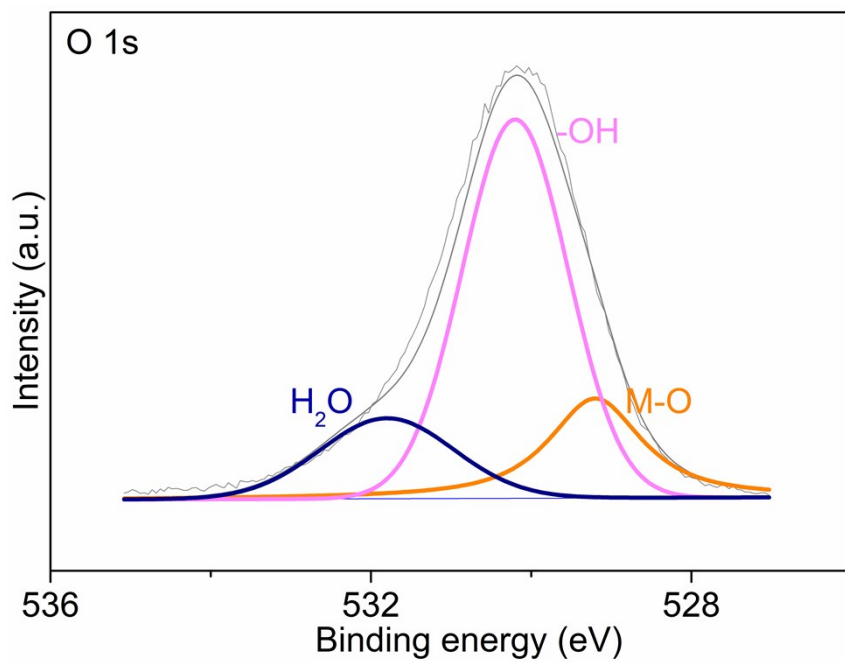

**Fig. S8.** High-resolution XPS scans of NCMB-2 in the O 1s regions after the OER test.

**Table S1.** Metal ions concentration in leachate precursors.

| Sample                                                                                     | Concentration (g L <sup>-1</sup> ) |      |       |      |      |
|--------------------------------------------------------------------------------------------|------------------------------------|------|-------|------|------|
|                                                                                            | Ni                                 | Co   | Mn    | Al   | Li   |
| LiNi <sub>0.5</sub> Co <sub>0.2</sub> Mn <sub>0.3</sub> O <sub>2</sub><br>derived leachate | 18.53                              | 7.19 | 10.56 | 7.24 | 3.09 |
| LiNi <sub>0.8</sub> Co <sub>0.1</sub> Mn <sub>0.1</sub> O <sub>2</sub><br>derived leachate | 32.61                              | 4.38 | 4.01  | 5.12 | 3.68 |

**Table S2.1.** Experimental parameters adjusted during ICP-MS analysis of ions.

| Parameter                        | Value                    |
|----------------------------------|--------------------------|
| RF Power                         | 1.50 KW                  |
| Plsama flow                      | 15.0 L min <sup>-1</sup> |
| Auxiliary flow                   | 1.00 L min <sup>-1</sup> |
| Nebulizer flow                   | 0.10 L min <sup>-1</sup> |
| Sample uptake delay              | 30 s                     |
| Instrumental stabilizatoin delay | 30 s                     |
| Reolocate read time              | 5 s                      |
| Reolocate read                   | 3 times                  |

**Table S2.2.** Experimental parameters adjusted during ICP-OES analysis of ions.

| Parameter                        | Value                    |
|----------------------------------|--------------------------|
| RF Power                         | 1.3 kW                   |
| Plsama flow                      | 15.0 L min <sup>-1</sup> |
| Auxiliary flow                   | 1.50 L min <sup>-1</sup> |
| Nebulizer flow                   | 0.75 L min <sup>-1</sup> |
| Sample uptake delay              | 60 s                     |
| Sample pump rate                 | 15 rmp                   |
| Sample rinse time                | 5 s                      |
| Instrumental stabilizatoin delay | 15 s                     |
| Standards                        | Quantitative             |
| % slope deviation                | 10                       |
| No of standards                  | 15                       |
| Correlation coefficient          | 0.995000                 |
| Curve type                       | Quadratic & linear       |

**Table S3.** A summary of metal recovery from spent LIBs with state-of-the-art techniques.

| Battery type                                                                                                        | Recovery method                                | Recovery rate (%) |              |              | References                                                    |
|---------------------------------------------------------------------------------------------------------------------|------------------------------------------------|-------------------|--------------|--------------|---------------------------------------------------------------|
|                                                                                                                     |                                                | Ni                | Co           | Mn           |                                                               |
| LiNi <sub>1/3</sub> Co <sub>1/3</sub> Mn <sub>1/3</sub> O <sub>2</sub> ,<br>LiCoO <sub>2</sub> , LiMnO <sub>2</sub> | Precipitation, solvent extraction              | 98.7              | 98.2         | 97.1         | <i>Waste Manage.</i> , 2015, 38, 349-356.                     |
| LiNi <sub>1/3</sub> Co <sub>1/3</sub> Mn <sub>1/3</sub> O <sub>2</sub>                                              | Step-wise precipitation                        | 97                | 97           | 98           | <i>J. Alloy Compd.</i> , 2020, 847, 156489.                   |
| LiNi <sub>0.5</sub> Mn <sub>0.3</sub> Co <sub>0.2</sub> O <sub>2</sub>                                              | Selective dissolution, step-wise precipitation | 99.7              | 96.5         | 93.5         | <i>ACS Sustainable Chem. Eng.</i> , 2019, 7, 15, 12718-12725. |
| Mixed spent LIBs                                                                                                    | Multi-step directional precipitation           | 99.6              | 99.2         | 99.5         | <i>RSC Adv.</i> , 2021, 11, 268-277.                          |
| Spent LIBs                                                                                                          | Step-wise precipitation                        | ~89               | 98.93        | ~92          | <i>Chem. Eng. J.</i> , 2015, 281, 418-427.                    |
| Spent LIBs                                                                                                          | Solvent extraction, step-wise precipitation    | ~99               | -            | ~98          | <i>Sep. Purif. Technol.</i> , 2019, 209, 725-733.             |
| LiNi <sub>0.5</sub> Mn <sub>0.3</sub> Co <sub>0.2</sub> O <sub>2</sub>                                              | Selective leaching, adsorption separation      | 96.23             | 94.57        | -            | <i>ACS Sustainable Chem. Eng.</i> , 2017, 5, 12, 11489-11495. |
| Spent LIBs                                                                                                          | Step-wise precipitation                        | 98.5              | 96.8         | -            | <i>J. Clean. Prod.</i> , 2016, 112, 3562-3570.                |
| Spent LIBs                                                                                                          | Step-wise precipitation                        | -                 | 90           | 95           | <i>J. Clean. Prod.</i> , 2017, 147, 37-43.                    |
| LiNi <sub>0.5</sub> Co <sub>0.2</sub> Mn <sub>0.3</sub> O <sub>2</sub>                                              | <b>One-step boriding</b>                       | <b>99.93</b>      | <b>99.91</b> | <b>99.90</b> | <b>This study</b>                                             |
| LiNi <sub>0.8</sub> Co <sub>0.1</sub> Mn <sub>0.1</sub> O <sub>2</sub>                                              | <b>One-step boriding</b>                       | <b>99.91</b>      | <b>99.92</b> | <b>99.84</b> | <b>This study</b>                                             |

**Table S4.** A summary of OER properties for reported electrocatalysts supported on nickel foam.

| Catalyst                                      | Electrolyte | Overpotential @j<br>(mV@ mA cm <sup>-2</sup> ) | References                                              |
|-----------------------------------------------|-------------|------------------------------------------------|---------------------------------------------------------|
| CoMoS <sub>x</sub> /NF                        | 1 M KOH     | 442@500                                        | <i>Angew. Chem. Int. Ed.</i> , 2020, 59,<br>1659.       |
| Co-MOF/NF                                     | 1 M KOH     | 270@10                                         | <i>Small</i> , 2019, 15, 1906086.                       |
| Co@NC/NF                                      | 1 M KOH     | 330@10                                         | <i>Adv. Energy Mater.</i> , 2018, 8,<br>1702838.        |
| CoNW/NF                                       | 1 M KOH     | 534@100                                        | <i>Green Chem.</i> , 2019, 21(24):<br>6699-6706.        |
| HfN/NF                                        | 1 M KOH     | 358@10                                         | <i>Angew. Chem. Int. Ed.</i> , 2019, 58,<br>15464.      |
| HOF-Co <sub>0.5</sub> Fe <sub>0.5</sub> /NF   | 1 M KOH     | 278@10                                         | <i>Appl. Catal. B: Environ.</i> , 2019,<br>258, 117973. |
| NiO/Co <sub>3</sub> O <sub>4</sub>            | 1 M KOH     | 262@10                                         | <i>ACS Catal.</i> , 2020, 10: 12376-<br>12384.          |
| Ni <sub>3</sub> FeAl <sub>0.91</sub> -LDHs/NF | 1 M KOH     | 304@20                                         | <i>Nano Energy</i> , 2017, 35: 350-357.                 |
| NiCo-POM/NF                                   | 0.1 M KOH   | 360@10                                         | <i>Angew. Chem. Int. Ed.</i> 2017, 56,<br>4941.         |
| CoTe nanoarrays/NF                            | 1 M KOH     | 350@100                                        | <i>Small Methods</i> , 2019, 3(5):<br>1900113.          |
| Ni <sub>x</sub> B/NF                          | 1 M KOH     | 280@20                                         | <i>Adv. Energy Mater.</i> , 2017, 7,                    |

1700381.

|               |         |         |                   |
|---------------|---------|---------|-------------------|
| <b>NCMB-1</b> | 1 M KOH | 271@10  | <b>This study</b> |
|               |         | 330@100 |                   |
|               |         | 399@500 |                   |
| <b>NCMB-2</b> | 1 M KOH | 263@10  | <b>This study</b> |
|               |         | 318@100 |                   |
|               |         | 372@500 |                   |

---

**Table S5.** Calculated charge transfer resistance ( $R_f$ ,  $R_{ct}$ ) and solution resistance ( $R_s$ ) (in Ohm,  $\Omega$ ) of the materials deposited on NF obtained from the Nyquist plot during the EIS experiments.

|        | $R_s$ | $R_f$ | $R_{ct}$ |
|--------|-------|-------|----------|
| NCMB-1 | 1.2   | 0.59  | 15.8     |
| NCMB-2 | 1.4   | 5.8   | 13.1     |
| NF     | 1.7   | 0.97  | 177.1    |
